# Supplementary material for: Graphene quantum dots–three-dimensional graphene composites for high-performance supercapacitors
Source: Royal Society of Chemistry journal article supplement (doi:10.1039/c4cp02761b), 2014-01-01
Supplement: c4cp02761b1.pdf [file c4cp02761b1.pdf]

Table S1. The change in the mass of 3DG samples before and after the GQD deposition for 10 h.

| Sample ID | Mass before<br>GQDs deposition (g) | Mass after<br>GQDs deposited (g) | Percentage of change<br>in mass (%) |
|-----------|------------------------------------|----------------------------------|-------------------------------------|
| Sample 1  | 0.9635                             | 0.9869                           | 2.428                               |
| Sample 2  | 0.8973                             | 0.9342                           | 4.112                               |
| Sample 3  | 0.8903                             | 0.9348                           | 4.998                               |
| Sample 4  | 1.0737                             | 1.0895                           | 1.471                               |
| Sample 5  | 2.1018                             | 2.1859                           | 4.001                               |
| Sample 6  | 1.9715                             | 1.9999                           | 1.440                               |

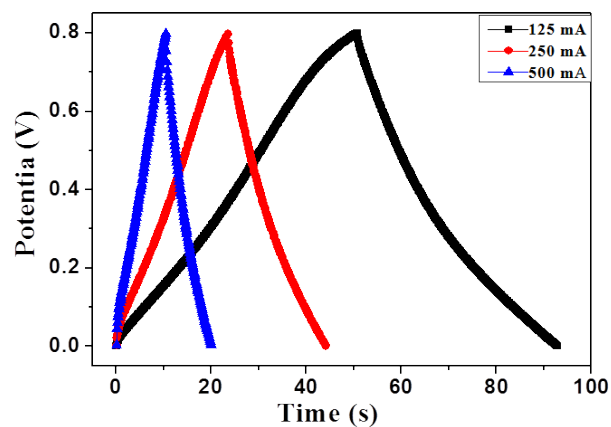

Fig. S1. Galvanostatic charge-discharge curves at a current density of 1.25 A g<sup>-1</sup>, 2.5 A g<sup>-1</sup> and 5 A g<sup>-1</sup> for Devices D. Device D was assembled in the same configuration as Devices A , B and C except that it was fabricated from two 3DG electrodes that were applied a bias of 2 V for 10 h in the *GQD-free* solution. The calculated capacitance from the charge-discharge curve is 131 F g<sup>-1</sup> at discharge current density of 1.25 A g<sup>-1</sup>, nearly equal to the device A (3DG).
